# Supplementary material for: The impact of water consumption on hydration and cognition among schoolchildren: Methods and results from a crossover trial in rural Mali
Source: PLoS One. 2019 Jan 17;14(1):e0210568. doi: 10.1371/journal.pone.0210568 (PMC6336322; doi:10.1371/journal.pone.0210568)
Supplement: S1 File — (XLSX) [file pone.0210568.s001.xlsx]

## Sheet: data
ID	Age	COLORAM	COLORPM	Comments_COG	Comments_Sch	dehydAM	dehydPM	EAUJOUR2	Grade	Intervention	LCS	LCC	LCI	LCX	IDC	IDI	IDX	IDS	IIC	III	IIX	IIS	NFC	NFM	NFX	NRC	NRM	NRX	LT	LTM	LTE	LTX	P105	P106	P107	P108	Pres1	Pres2	school	sex	SGAM	SGPM	Test1	Test2	Thirsty	Temp1	Humid1	Temp2	Humid2
1007	12	4	2		Deworming done by CAP	0	0		6	Day 2	10	10	0		3	0		3	1	0		1	6	4		6	5		3	3	0		0	0	0		x	x	A	f	1.009	1.003	B2	B1	1
1007	12	2	1	NR: Did not reverse digits; Numbers read in reverse order	Deworming done by CAP	0	0		6	Day 2	21	21	0		4	0		4	1	1		0	5	4		0	0	2	12	13	1		0	1	0		x	x	A	f	1.007	1	B2	B1	5
1008	11	2	3	NR: Numbers read in reverse order	Deworming done by CAP	0	0		6	Day 2	27	27	0		2	0		2	3	0		3	7	5		7	5	1	11	11	0		1	1	1	2,5	x	x	A	f	1.007	1.004	A1	A2	3
1008	11	2	3	Reversed line direction	Deworming done by CAP	0	1		6	Day 2	18	18	0		2	1		1	2	2		0	4	3		1	2		8	8	0	R	1	1	1	2,	x	x	A	f	1.004	1.012	A1	A2	3
1009	11	1	1	NR: Numbers read in reverse order	Deworming done by CAP	0	0		6	Day 2	21	21	0		3	0		3	2	0		2	7	5		3	3	1	22	23	1		1	1	1	2,5	x	x	A	m	1.002	1	B2	B1	2
1009	11	1	2	Selected wrong targets	Deworming done by CAP	0	1		6	Day 2	-14	0	14	1	1	0		1	2	0		2	5	4		6	5		9	10	1		1	1	1	,5	x	x	A	m	1.002	1.01	B2	B1	1
1010	13	1	6		Deworming done by CAP	0	1		6	Day 2	10	10	0		1	0		1	2	1		1	6	4		6	5		4	4	0		2	1	1	,5	x	x	A	f	1.001	1.013	A1	A2	1
1010	13	2	6	NR: Numbers read in reverse order	Deworming done by CAP	0	1		6	Day 2	23	23	0		4	0		4	2	0		2	5	4		4	3	1	12	13	1		2	1	1	,5	x	x	A	f	1.003	1.015	A1	A2	5
1011	11	2	3	(NR) Didn't reverse numbers	Deworming done by CAP	0	1		6	Day 2	19	19	0		2	0		2	1	2		-1	6	4		0	0	2	17	19	2		1	1	1	1,5,6	x	x	A	m	1.007	1.018	A2	A1	1
1011	11	2	6	NR: Numbers read in reverse order	Deworming done by CAP	1	1		6	Day 2	34	34	0		3	0		3	3	0		3	4	5		4	5	1	18	20	2		1	1	1	2,5	x	x	A	m	1.021	1.016	A2	A1	3
1012	13	2	4	(NR) Didn't reverse numbers	Deworming done by CAP	0	1		6	Day 2	22	23	1		6	2		4	3	1		2	3	4		1	2	2	24	29	5		1	1	1	2,5	x	x	A	m	1.008	1.011	B2	B1	1
1012	13	1	4	NR: Numbers read in reverse order; LT: Reversed line	Deworming done by CAP	0	1		6	Day 2	32	32	0		7	1		6	3	0		3	6	4		4	4	1	15	16	1	R	1	1	1	2,6	x	x	A	m	1.003	1.012	B2	B1	5
1013	11	1	1	(NR) Didn't reverse numbers	Deworming done by CAP	0	0		6	Day 2	6	6	0		2	0		2	3	0		3	5	4		0	0	2	26	28	2		1	1	1	1,2,5	x	x	A	m	1	1	B1	B2	1
1013	11	2	2	NR: Numbers read in reverse order	Deworming done by CAP	1	0		6	Day 2	13	13	0		2	0		2	5	0		5	7	5		8	5	1	27	29	2		1	1	1	1,2,5	x	x	A	m	1.012	1.001	B1	B2	1
1014	13	3			Deworming done by CAP	0	1		6	Day 2	11	11	0		1	0		1	2	0		2	5	4		1	2		7	7	0		1	1	1	1,2,5	x	x	A	f	1.004	1.016	B2	B1	1
1014	13	2	3	NR: Numbers read in reverse order	Deworming done by CAP	0	0		6	Day 2	19	19	0		2	0		2	2	0		2	6	5		4	5	1	9	9	0		1	1	1	2,5	x	x	A	f	1.009	1.006	B2	B1	4
1015	11	1	3	NR: Numbers read in reverse order	Deworming done by CAP	0	1		6	Day 2	27	27	0		3	0		3	3	0		3	6	4		6	5	1	6	8	2		2	1	1	2,5	x	x	A	m	1.001	1.014	A1	A2	4
1015	11	3	6	(NR) Didn't reverse numbers	Deworming done by CAP	1	1		6	Day 2	24	24	0		2	0		2	3	0		3	4	4		1	3	2	10	10	0		2	1	1	2,5	x	x	A	m	1.015	1.019	A1	A2	1
1016	11	2	2	NR: Numbers read in reverse order	Deworming done by CAP	1	0		6	Day 2	29	29	0		3	0		3	3	1		2	6	4		1	2	1	23	25	2		1	1	0		x	x	A	f	1.014	1.003	A2	A1	5
1016	11	3	4		Deworming done by CAP	0	1		6	Day 2	16	16	0		2	0		2	2	1		1	4	4		6	4		24	24	0		1	1	1	1,5	x	x	A	f	1.005	1.015	A2	A1	1
1017	11	1	3	NR: Numbers read in reverse order	Deworming done by CAP	0	1		6	Day 2	34	34	0		4	0		4	2	0		2	6	5		3	3	1	20	21	1		1	1	0		x	x	A	m	1.008	1.012	B1	B2	4
1017	11	3	3		Deworming done by CAP	0	1		6	Day 2	25	25	0		0	2	X	-2	4	0		4	6	5		7	5		20	21	1		1	1	1	1,2,6	x	x	A	m	1.007	1.015	B1	B2	2
1018	13	3	4	(NR) Didn't reverse numbers	Deworming done by CAP	1	1		6	Day 2	14	14	0		3	1		2	1	2		-1	4	4		1	2	2	2	2	0		2	1	0		x	x	A	m	1.011	1.011	A1	A2	1
1018	13	1	1	NR: Numbers read in reverse order; LT: Reversed line	Deworming done by CAP	0	0		6	Day 2	25	25	0		5	1		4	4	0		4	4	3		4	5	1	7	8	1	R	2	1	1	2,5	x	x	A	m	1.003	1	A1	A2	4
1019	13	1	4	(NR) Didn't reverse numbers	Deworming done by CAP	0	1		6	Day 2	15	15	0		1	2		-1	2	0		2	5	4		1	2	2	8	8	0		1	1	1	,5	x	x	A	f	1.001	1.015	A2	A1	1
1019	13	2	2	NR: Numbers read in reverse order	Deworming done by CAP	0	0		6	Day 2	34	34	0		2	0		2	2	1		1	6	4		4	3	1	13	13	0		1	1	1	1,5	x	x	A	f	1.005	1.002	A2	A1	3
1020	11	1	2	(NR) Didn't reverse numbers	Deworming done by CAP	0	0		6	Day 2	24	24	0		3	0		3	2	0		2	6	5		0	0	2	17	17	0		1	1	1	,5	x	x	A	f	1.004	1.008	B1	B2	1
1020	11	2	3	NR: Numbers read in reverse order	Deworming done by CAP	0	1		6	Day 2	36	36	0		3	0		3	3	0		3	6	4		3	3	1	18	19	1		1	1	1	,5	x	x	A	f	1.004	1.013	B1	B2	1
1021	11	1	3		Deworming done by CAP	0	1		6	Day 2	18	18	0		1	1		0	2	0		2	4	3		4	5		10	10	0		1	1	1	2,5	x	x	A	f	1.005	1.016	B2	B1	5
1021	11	1	1	NR: Numbers read in reverse order	Deworming done by CAP	0	0		6	Day 2	28	28	0		3	2		1	4	1		3	4	4		3	3	1	15	17	2		1	1	1	,5	x	x	A	f	1.002	1	B2	B1	2
1022	13	2	1	NR: Numbers read in reverse order	Deworming done by CAP	0	0		6	Day 2	28	28	0		1	0		1	3	0		3	4	4		5	4	1	14	15	1		2	1	1	1,5	x	x	A	f	1.004	1	A1	A2	1
1022	13	1	1	(NR) Didn't reverse numbers; Reversed line direction	Deworming done by CAP	0	0		6	Day 2	21	21	0		2	0		2	0	2	X	-2	3	3		0	0	2	14	15	1	R	2	1	1	,5	x	x	A	f	1	1.003	A1	A2	1
1023	11	2	2	NR: Numbers read in reverse order	Deworming done by CAP	0	0		6	Day 2	18	18	0		3	0		3	2	1		1	6	4		3	3	1	5	5	0		2	1	1	2,5	x	x	A	f	1.005	1.001	A2	A1	3
1023	11	3	6	Circled entire image (ID)	Deworming done by CAP	1	1		6	Day 2	14	14	0		0	0	X	0	2	0		2	5	5		5	4		4	4	0		2	1	1	1,2,5	x	x	A	f	1.01	1.02	A2	A1	4
1024	10	2	2	NR: Numbers read in reverse order	Deworming done by CAP	0	0		6	Day 2	24	24	0		2	0		2	2	1		1	5	4		4	4	1	12	15	3		1	1	1	,2	x	x	A	f	1.006	1	B1	B2	2
1024	10	2	1	(NR) Didn't reverse numbers	Deworming done by CAP	0	0		6	Day 2	11	11	0		1	0		1	2	0		2	5	4		1	4	2	8	8	0		1	1	1	,2	x	x	A	f	1.009	1.006	B1	B2	5
1027	11	2	6	NR: Numbers read in reverse order; LT: Reversed line	Deworming done by CAP	0	0		6	Day 2	10	10	0		4	2		2	2	2		0	6	4		4	4	1	24	24	0	R	1	1	1	1,2,5	x	x	A	f	1.007	1.009	A1	A2	5
1027	11	2	3	(NR) Didn't reverse numbers	Deworming done by CAP	0	0		6	Day 2	9	9	0		4	0		4	2	2		0	0	5		0	0	2	27	29	2		1	1	1	2,5	x	x	A	f	1.004	1.008	A1	A2	1
1035		3	3		Deworming done by CAP	0	1		5	Day 2	23	23	0		1	1		0	2	0		2	4	3		5	5		15	15	0		1	1	0		x	x	A	f	1.009	1.019	A2	A1	1
1035		2	7		Deworming done by CAP	0	1		5	Day 2	31	31	0		4	0		4	2	1		1	2	2		2	2		14	15	1		1	1	1	,5	x	x	A	f	1.007	1.022	A2	A1	5
1036		4	4		Deworming done by CAP	1	1		5	Day 2	34	34	0		3	0		3	2	2		0	4	3		4	3		19	20	1		1	0	0		x	x	A		1.012	1.018	B1	B2	5
1036		2	1		Deworming done by CAP	0	0		5	Day 2	31	31	0		2	3		-1	3	1		2	4	3		3	3		19	19	0		1	1	1	2,5	x	x	A		1.009	1	B1	B2	1
1037		3	4		Deworming done by CAP	1	1		5	Day 2	12	12	0		2	1		1	4	0		4	6	4		4	4		28	29	1		1	0	0		x	x	A		1.01	1.02	B2	B1	1
1037		3	4		Deworming done by CAP	1	1		5	Day 2	32	32	0		4	0		4	2	2		0	4	3		4	3		14	14	0		1	1	0		x	x	A		1.012	1.016	B2	B1	5
1039		2	1		Deworming done by CAP	0	0		5	Day 2	38	38	0		4	0		4	5	0		5	4	3		3	3		18	18	0		1	1	1	,5	x	x	A	f	1.003	1	A2	A1	5
1039		2	3		Deworming done by CAP	0	0		5	Day 2	23	23	0		2	0		2	3	0		3	6	5		2	3		16	16	0		1	0	1	,5	x	x	A	f	1.004	1.009	A2	A1	5
1040		2	4		Deworming done by CAP	0	1		5	Day 2	20	20	0		4	0		4	2	1		1	4	3		3	3		24	25	1		1	0	1	,5	x	x	A		1.001	1.018	B1	B2	1
1040		2	6		Deworming done by CAP	0	1		5	Day 2	28	28	0		3	0		3	2	1		1	4	3		3	3		20	20	0		1	1	1	2,5	x	x	A		1.001	1.01	B1	B2	5
1041		1	6		Deworming done by CAP	0	1		5	Day 2	34	34	0		3	0		3	5	1		4	5	4		4	3		29	29	0		1	0	1	,5	x	x	A		1	1.014	B2	B1	2
1041		1	1		Deworming done by CAP	0	0		5	Day 2	36	36	0		5	0		5	4	0		4	6	5		5	4		27	28	1		1	1	1	2,5	x	x	A		1	1	B2	B1	4
1042		3	6		Deworming done by CAP	1	1		5	Day 2	30	30	0		2	0		2	3	0		3	6	4		3	3		23	28	5		1	1	1	1,2	x	x	A	f	1.012	1.017	A1	A2	1
1042		2	4	(NR) Didn't reverse numbers	Deworming done by CAP	0	0		5	Day 2	29	29	0		1	0		1	1	1		0	6	5		0	0	2	18	28	10		1	1	1	2,5	x	x	A	f	1.001	1.009	A1	A2	3
1043		3	4	(NR) Didn't reverse numbers	Deworming done by CAP	0	1		5	Day 2	18	18	0		0	0		0	1	0		1	6	4		0	0	2	25	28	3		1	0	1	,2	x	x	A		1.008	1.014	A2	A1	4
1043		3	1	NR: Did not reverse digits	Deworming done by CAP	1	0		5	Day 2	20	20	0		1	0		1	2	0		2	5	4		0	0	2	12	12	0		1	1	1	,2	x	x	A		1.012	1	A2	A1	5
1044		6	7		Deworming done by CAP	1	1		5	Day 2	32	32	0		3	0		3	3	0		3	6	5		2	2		17	17	0		1	1	1	,1	x	x	A		1.019	1.022	B1	B2	5
1044		6	2	Often forgot to reverse digits (NR); Reversed line direction (LT)	Deworming done by CAP	1	0		5	Day 2	30	30	0		2	0		2	2	0		2	3	3		2	5	2	14	15	1	R	1	1	1	,5	x	x	A		1.015	1.007	B1	B2	5
1045		3	6		Deworming done by CAP	1	1		5	Day 2	29	29	0		6	1		5	4	2		2	6	4		2	2		8	8	0		1	1	1	2,5	x	x	A		1.018	1.015	B2	B1	3
1045		2	6	Reversed line direction	Deworming done by CAP	1	1		5	Day 2	25	25	0		1	1		0	4	0		4	6	4		2	3		18	20	2	R	1	1	1	2,5	x	x	A		1.01	1.022	B2	B1	1
1046		1	3	(LC) Cancelled Vs and Us; (LT) traced outside of lines	Deworming done by CAP	0	1		5	Day 2	-8	3	11	1	2	1		1	2	1		1	3	3		1	2					X	1	1	1	,5	x	x	A		1.001	1.017	A1	A2	5
1046		2	4	LC: Cancelled V's, U's; LT: Reversed line	Deworming done by CAP	0	1		5	Day 2	-14	9	23	1	3	1		2	5	0		5	3	3		2	2		12	12	0	R	1	1	1	,5	x	x	A		1.004	1.013	A1	A2	5
1047		1	6		Deworming done by CAP	0	1		5	Day 2	30	30	0		2	0		2	2	1		1	4	4		5	5		18	18	0		2	0	1	,2	x	x	A		1.004	1.021	A2	A1	1
1047		1	2		Deworming done by CAP	0	0		5	Day 2	33	33	0		2	0		2	4	0		4	6	5		1	2		14	14	0		2	1	1	,2	x	x	A		1.001	1	A2	A1	1
1048		4	2		Deworming done by CAP	0	0		5	Day 2	25	25	0		4	1		3	1	1		0	4	4		4	3		29	29	0		0	0	1	,5	x	x	A	f	1.007	1.003	B1	B2	1
1048		2	4		Deworming done by CAP	1	1		5	Day 2	27	27	0		5	4		1	4	1		3	5	4		4	4		12	12	0		0	1	1	1,2	x	x	A	f	1.011	1.011	B1	B2	5
1049		1	1		Deworming done by CAP	0	0		5	Day 2	29	29	0		3	1		2	2	0		2	7	5		6	4		27	28	1		1	1	1	,2	x	x	A		1.001	1	B2	B1	1
1049		3	3		Deworming done by CAP	1	0		5	Day 2	22	22	0		2	2		0	3	1		2	1	2		3	3		23	24	1		1	0	0		x	x	A		1.011	1.003	B2	B1	1
1050		1	2		Deworming done by CAP	0	0		5	Day 2	26	26	0		4	0		4	2	0		2	5	5		6	5		17	17	0		1	1	1	1,2,5	x	x	A		1.001	1	A1	A2	5
1050		1	4	Reversed line direction	Deworming done by CAP	0	1		5	Day 2	14	14	0		3	0		3	0	1		-1	6	5		5	4		18	18	0	R	1	1	1	,2	x	x	A		1	1.011	A1	A2	5
1051		1	2		Deworming done by CAP	0	0		5	Day 2	32	32	0		3	0		3	2	1		1	3	3		5	4		10	10	0		1	1	1	,2	x	x	A		1.003	1.002	A2	A1	4
1051		3	3		Deworming done by CAP	0	1		5	Day 2	21	21	0		1	0		1	2	0		2	3	3		1	2		11	11	0		1	1	1	1,2,5	x	x	A		1.005	1.015	A2	A1	2
1052		6	7	Reversed line direction	Deworming done by CAP	0	1		5	Day 2	29	29	0		4	0		4	1	0		1	6	5		6	5		17	19	2	R	1	1	1	1,2,5	x	x	A		1.009	1.016	B1	B2	5
1052		4	4		Deworming done by CAP	1	1		5	Day 2	33	33	0		2	2		0	3	1		2	6	4		6	4		14	14	0		1	1	1	1,2	x	x	A		1.017	1.016	B1	B2	5
1053		3	2		Deworming done by CAP	1	0		5	Day 2	25	25	0		2	1		1	2	0		2	6	5		4	4		10	10	0		1	1	1	1,2	x	x	A		1.017	1.002	B2	B1	1
1053		2	3	Reversed line direction	Deworming done by CAP	0	1		5	Day 2	21	21	0		2	0		2	2	0		2	5	4		2	2		13	14	1	R	1	1	1	,5	x	x	A		1.005	1.015	B2	B1	1
1054		3	3		Deworming done by CAP	1	1		5	Day 2	24	24	0		2	0		2	2	1		1	5	4		4	3		20	20	0		1	1	1	,5	x	x	A	m	1.01	1.013	A1	A2	5
1054		1	2		Deworming done by CAP	0	0		5	Day 2	29	29	0		2	0		2	3	0		3	6	5		2	2		19	20	1		1	1	1	,5	x	x	A	m	1	1.006	A1	A2	3
1055		4	6		Deworming done by CAP	0	1		5	Day 2	14	14	0		1	0		1	1	0		1	6	4		2	3		14	14	0		1	0	1	,1	x	x	A	m	1.006	1.015	A2	A1	3
1055		2	2		Deworming done by CAP	0	0		5	Day 2	25	26	1		2	0		2	2	0		2	7	5		4	3		15	15	0		1	1	1	1,5	x	x	A	m	1.006	1.005	A2	A1	3
1056		1	6	Selected 3 faces on thirst scale (1-3); Circled on study image(II) - score was 2,0; Reversed line direction	Deworming done by CAP	0	1		5	Day 2	27	27	0		0	1		-1	0	0	X	0	6	4		5	5		13	13	0	R	1	1	1	,5	x	x	A	m	1.001	1.011	B1	B2
1056		1	2	Th: Chose both "1" and "2" for thirst scale	Deworming done by CAP	0	0		5	Day 2	34	34	0		3	1		2	1	1		0	1	2		4	4		7	8	1		1	1	1	,5	x	x	A	m	1.001	1.004	B1	B2	1.5
1057		1	4		Deworming done by CAP	0	1		5	Day 2	27	27	0		2	1		1	3	0		3	5	4		3	3		27	28	1		2	1	1	1,2,5	x	x	A		1.002	1.014	B2	B1	1
1057		2	2		Deworming done by CAP	0	0		5	Day 2	32	32	0		4	1		3	3	0		3	3	3		2	2		20	20	0		2	1	1	1,2,5	x	x	A		1.007	1.003	B2	B1	4
1058		1	1		Deworming done by CAP	0	0		5	Day 2	36	37	1		2	1		1	3	0		3	6	5		4	4		19	21	2		1	0	1	,2	x	x	A		1.001	1	A1	A2	5
1058		3	6		Deworming done by CAP	1	1		5	Day 2	30	30	0		4	0		4	3	0		3	6	4		2	3		21	21	0		1	0	0		x	x	A		1.012	1.017	A1	A2	5
1059		1	6		Deworming done by CAP	0	1		5	Day 2	29	29	0		0	0		0	1	0		1	6	4		5	4		14	14	0		1	1	1	,5	x	x	A		1	1.014	A2	A1	3
1059		1	3		Deworming done by CAP	0	0		5	Day 2	29	29	0		3	0		3	3	2		1	7	6		3	3		12	13	1		1	1	1	1,5	x	x	A		1.003	1.004	A2	A1	4
1060		2	4	Didn't do task (ID); Circled on study image(II) - score was 1,2; Often forgot to reverse digits (NR)	Deworming done by CAP	0	1		5	Day 2	25	25	0		0	0	X	0	0	0	X	0	5	4		2	4	2	24	29	5		1	1	1	,5	x	x	A		1.005	1.015	B1	B2	1
1060		2	3		Deworming done by CAP	0	1		5	Day 2	30	30	0		2	0		2	3	0		3	4	3		3	3		27	29	2		1	1	1	1,5	x	x	A		1.006	1.012	B1	B2	5
1061		1	2	Didn't do task (ID)	Deworming done by CAP	0	0		5	Day 2	23	23	0		0	0	X	0	2	0		2	6	4		5	4		18	18	0		1	1	1	,5	x	x	A		1.002	1.001	B2	B1	1
1061		1	2		Deworming done by CAP	0	0		5	Day 2	30	30	0		4	0		4	4	0		4	7	5		5	4		10	10	0		1	1	1	,5	x	x	A		1.006	1.002	B2	B1	1
1062		3	7		Deworming done by CAP	0	1		5	Day 2	28	28	0		1	0		1	1	1		0	4	3		2	3		17	17	0		0	1	1	1,2,5	x	x	A		1.005	1.015	A1	A2	1
1062		1	4		Deworming done by CAP	0	0		5	Day 2	33	33	0		1	0		1	3	0		3	5	5		5	4		10	11	1		0	1	1	,5	x	x	A		1	1.009	A1	A2	1
1063		2	3		Deworming done by CAP	0	1		5	Day 2	20	20	0		1	0		1	2	0		2	5	4		4	3		11	11	0		2	0	1	1,2	x	x	A		1.009	1.016	A2	A1	2
1063		1	1		Deworming done by CAP	0	0		5	Day 2	29	29	0		4	0		4	5	0		5	6	5		4	3		7	7	0		2	0	1	,2	x	x	A		1.004	1	A2	A1	3
1151	16	2	4		There is water every day, but not always all day (don't refill in the afternoon)	1	1	Y	6	Day 1	30	30	0		2	1		1	1	0		1	6	7		3	3		17	19	2		1	1	1	5	Y	Y	B	F	1.012	1.022	B1	B2	4	103	26	102	19
1151	16	2	4		There is water every day, but not always all day (don't refill in the afternoon)	1	1	Y	6	Day 1	18	18	0		1	0		1	2	0		2	5	7		4	3		4	4	0		1	1	0		Y	Y	B	F	1.012	1.021	B1	B2	2	103	26	102	19
1152	14	1	3		There is water every day, but not always all day (don't refill in the afternoon)	0	1	N	6	Day 1	26	26	0		3	0		3	2	0		2	7	5		6	4		29	29	0		1	1	1	5	Y	Y	B	M	1.001	1.016	B2	B1	3	103	26	102	19
1152	14	1	6		There is water every day, but not always all day (don't refill in the afternoon)	0	1	N	6	Day 1	24	24	0		1	0		1	1	0		1	5	4		5	4		15	15	0		1	1	1	5	Y	Y	B	M	1.001	1.014	B2	B1	3	103	26	102	19
1153	12	3	4		There is water every day, but not always all day (don't refill in the afternoon)	1	1	Y	6	Day 1	19	19	0		5	0		5	3	0		3	6	5		7	5		27	29	2		1	1	1	5	Y	Y	B	M	1.012	1.02	A1	A2	4	103	26	102	19
1153	12	6	6		There is water every day, but not always all day (don't refill in the afternoon)	1	1	Y	6	Day 1	21	21	0		3	0		3	3	0		3	5	4		7	5		8	9	1		1	1	1	1	Y	Y	B	M	1.013	1.015	A1	A2	4	103	26	102	19
1154	13	3	3		There is water every day, but not always all day (don't refill in the afternoon)	1	1	Y	6	Day 1	27	27	0		2	0		2	1	1		0	5	4		4	3		5	6	1		1	1	1	2,6	Y	Y	B	M	1.015	1.012	A2	A1	5	103	26	102	19
1154	13	5	6		There is water every day, but not always all day (don't refill in the afternoon)	1	1	Y	6	Day 1	32	32	0		3	0		3	3	0		3	6	4		2	2		19	19	0		1	1	1	2,6	Y	Y	B	M	1.025	1.033	A2	A1	4	103	26	102	19
1155	14	4	3		There is water every day, but not always all day (don't refill in the afternoon)	1	1	Y	6	Day 1	38	38	0		4	0		4	6	0		6	12	7		6	5		26	28	2		1	1	1	1,5	Y	Y	B	F	1.015	1.016	B1	B2	5	103	26	102	19
1155	14	2	4		There is water every day, but not always all day (don't refill in the afternoon)	1	1	Y	6	Day 1	31	31	0		3	0		3	6	0		6	9	7		7	5		14	14	0		1	1	1	1,5	Y	Y	B	F	1.013	1.021	B1	B2	5	103	26	102	19
1156	11	3	2		There is water every day, but not always all day (don't refill in the afternoon)	1	1	N	6	Day 1	17	17	0		4	0		4	4	0		4	4	4		5	5		3	3	0		1	0	1	3	Y	Y	B	M	1.01	1.01	B2	B1	4	103	26	102	19
1156	11	3	3		There is water every day, but not always all day (don't refill in the afternoon)	1	1	N	6	Day 1	25	25	0		6	0		6	4	0		4	6	4		3	4		17	17	0		1	1	1	5	Y	Y	B	M	1.011	1.011	B2	B1	4	103	26	102	19
1157	16	1	3		There is water every day, but not always all day (don't refill in the afternoon)	0	1	Y	6	Day 1	16	16	0		2	0		2	1	1		0	4	3		2	2		15	15	0		1	1	1	1,5	Y	Y	B	M	1.001	1.012	A1	A2	5	103	26	102	19
1157	16	2	2		There is water every day, but not always all day (don't refill in the afternoon)	0	0	Y	6	Day 1	13	13	0		2	0		2	4	1		3	4	3		4	3		2	2	0		1	1	1	5	Y	Y	B	M	1.005	1.006	A1	A2	3	103	26	102	19
1158	14	2	2		There is water every day, but not always all day (don't refill in the afternoon)	1	1	Y	6	Day 1	29	29	0		5	0		5	5	0		5	6	5		3	3		21	23	2		1	1	1	1,2,5	Y	Y	B	F	1.011	1.013	A2	A1	3	103	26	102	19
1158	14	6	2		There is water every day, but not always all day (don't refill in the afternoon)	1	0	Y	6	Day 1	23	23	0		2	1		1	2	0		2	5	5		5	4		1	1	0		1	1	1	1,2,5	Y	Y	B	F	1.013	1.008	A2	A1	2	103	26	102	19
1159	12	1	3		There is water every day, but not always all day (don't refill in the afternoon)	0	1	Y	6	Day 1	26	26	0		3	1		2	4	0		4	8	5		2	2		15	15	0		1	1	1	5	Y	Y	B	M	1.003	1.012	B1	B2	5	103	26	102	19
1159	12	4	6		There is water every day, but not always all day (don't refill in the afternoon)	1	1	Y	6	Day 1	21	21	0		2	0		2	2	2		0	5	4		2	2		7	7	0		1	1	0		Y	Y	B	M	1.017	1.018	B1	B2	1	103	26	102	19
1160	13	2	4		There is water every day, but not always all day (don't refill in the afternoon)	0	1	Y	6	Day 1	19	19	0		4	0		4	4	0		4	8	5		5	4		16	16	0		1	1	1	5	Y	Y	B	M	1.004	1.015	B2	B1	3	103	26	102	19
1160	13	2	6		There is water every day, but not always all day (don't refill in the afternoon)	0	1	Y	6	Day 1	15	15	0		2	1		1	3	0		3	6	4		3	3		8	8	0		1	1	1	5	Y	Y	B	M	1.004	1.013	B2	B1	2	103	26	102	19
1161	13	1	1		There is water every day, but not always all day (don't refill in the afternoon)	0	0	Y	6	Day 1	23	25	2		2	0		2	4	1		3	4	4		6	4		7	7	0		1	1	1	5	Y	Y	B	F	1.003	1.004	A1	A2	3	103	26	102	19
1161	13	2	2		There is water every day, but not always all day (don't refill in the afternoon)	0	1	Y	6	Day 1	28	28	0		2	0		2	5	0		5	5	4		2	2		15	15	0		1	1	1	5,6	Y	Y	B	F	1.004	1.011	A1	A2	4	103	26	102	19
1162	12	1	4		There is water every day, but not always all day (don't refill in the afternoon)	0	1	Y	6	Day 1	19	19	0		4	0		4	3	0		3	8	5		5	5		13	13	0		1	1	1	2,5	Y	Y	B	M	1.001	1.021	A2	A1	5	103	26	102	19
1162	12	3	2		There is water every day, but not always all day (don't refill in the afternoon)	1	0	Y	6	Day 1	19	19	0		3	0		3	2	1		1	6	6		4	3		8	8	0		1	1	1	3,5	Y	Y	B	M	1.012	1.008	A2	A1	2	103	26	102	19
1163	12	6	1		There is water every day, but not always all day (don't refill in the afternoon)	1	0	Y	6	Day 1	14	14	0		2	1		1	1	0		1	8	6		6	5		13	14	1		1	1	1	2,5	Y	Y	B	M	1.013	1.002	B1	B2	5	103	26	102	19
1163	12	4	4		There is water every day, but not always all day (don't refill in the afternoon)	1	1	Y	6	Day 1	13	13	0		1	0		1	2	0		2	8	5		7	5		19	20	1		1	1	1	2,5	Y	Y	B	M	1.016	1.022	B1	B2	5	103	26	102	19
1164	13	2	1		There is water every day, but not always all day (don't refill in the afternoon)	1	0	Y	6	Day 1	30	30	0		6	0		6	4	0		4	6	7		6	5		23	24	1		1	1	1	1,5	Y	Y	B	M	1.011	1.003	B2	B1	4	103	26	102	19
1164	13	2	3		There is water every day, but not always all day (don't refill in the afternoon)	0	0	Y	6	Day 1	26	26	0		2	0		2	3	0		3	4	4		5	4		3	3	0		1	1	1	5	Y	Y	B	M	1.007	1.009	B2	B1	3	103	26	102	19
1165	14	1	2		There is water every day, but not always all day (don't refill in the afternoon)	0	1	Y	6	Day 1	27	27	0		1	0		1	1	0		1	5	4		4	3		26	29	3		1	1	1	2,5	Y	Y	B	F	1.001	1.012	A1	A2	4	103	26	102	19
1165	14	2	2	IIC: CIRCLED ON PAGE 8 AS WELL	There is water every day, but not always all day (don't refill in the afternoon)	0	0	Y	6	Day 1	25	25	0		2	0		2	4	0	X	4	4	4		6	4		8	9	1		1	1	1	5	Y	Y	B	F	1.004	1.006	A1	A2	5	103	26	102	19
1166	11	4	2		There is water every day, but not always all day (don't refill in the afternoon)	1	0	Y	6	Day 1	22	22	0		2	0		2	3	1		2	7	5		5	4		16	17	1		1	1	1	5	Y	Y	B	M	1.019	1.009	A2	A1	3	103	26	102	19
1166	11	3	6		There is water every day, but not always all day (don't refill in the afternoon)	1	1	Y	6	Day 1	25	25	0		3	0		3	3	0		3	5	4		2	2		26	27	1		1	1	1	1,5	Y	Y	B	M	1.01	1.017	A2	A1	4	103	26	102	19
1167	14	5	5		There is water every day, but not always all day (don't refill in the afternoon)	1	1	N	6	Day 1	26	26	0		3	1		2	5	1		4	8	7		4	4		17	17	0		1	1	1	1,5	Y	Y	B	M	1.011	1.015	B1	B2	3	103	26	102	19
1167	14	7	4		There is water every day, but not always all day (don't refill in the afternoon)	1	1	N	6	Day 1	14	14	0		5	0		5	5	0		5	5	4		5	4		7	7	0		1	1	1	2	Y	Y	B	M	1.011	1.016	B1	B2	4	103	26	102	19
1168	11	2	3		There is water every day, but not always all day (don't refill in the afternoon)	0	1	N	6	Day 1	24	24	0		3	1		2	2	0		2	6	5		6	5		15	16	1		1	1	1	5	Y	Y	B	M	1.007	1.015	B2	B1	5	103	26	102	19
1168	11	7	5		There is water every day, but not always all day (don't refill in the afternoon)	1	1	N	6	Day 1	14	14	0		2	0		2	2	0		2	5	4		4	3		8	8	0		1	1	1	1,5	Y	Y	B	M	1.02	1.018	B2	B1	3	103	26	102	19
1169	15	1	4	IDC AND IIC: CIRCLE NEAR NOT AROUND	There is water every day, but not always all day (don't refill in the afternoon)	0	1	N	6	Day 1	28	28	0		3	0	X	3	4	1	X	3	5	7		1	2		22	28	6		1	1	1	1,5	Y	Y	B	M	1.001	1.018	A1	A2	4	103	26	102	19
1169	15	1	2	IDC/IIC: CIRCLED NEAR, NOT AROUND DIFFERENCES	There is water every day, but not always all day (don't refill in the afternoon)	0	1	N	6	Day 1	2	11	9		2	0	X	2	5	2	X	3	5	4		1	2		19	24	5	R	1	1	1	5	Y	Y	B	M	1.002	1.02	A1	A2	5	103	26	102	19
1170	13	1	3		There is water every day, but not always all day (don't refill in the afternoon)	0	1	N	6	Day 1	28	28	0		3	0		3	3	0		3	7	5		2	2		12	12	0		1	1	1	5	Y	Y	B	M	1.001	1.016	A2	A1	4	103	26	102	19
1170	13	2	4		There is water every day, but not always all day (don't refill in the afternoon)	0	1	N	6	Day 1	23	23	0		2	0		2	2	0		2	5	4		4	3		3	3	0		1	0	0		Y	Y	B	M	1.007	1.02	A2	A1	3	103	26	102	19
1171	14	3	2		There is water every day, but not always all day (don't refill in the afternoon)	1	0	N	6	Day 1	20	20	0		2	0		2	2	1		1	5	4		5	4		18	18	0		1	1	1	5	Y	Y	B	M	1.016	1.006	B1	B2	2	103	26	102	19
1171	14	3	2		There is water every day, but not always all day (don't refill in the afternoon)	1	0	N	6	Day 1	19	19	0		2	0		2	1	2		-1	5	4		5	5		8	8	0		1	1	1	5	Y	Y	B	M	1.01	1.008	B1	B2	4	103	26	102	19
1172	13	3	2		There is water every day, but not always all day (don't refill in the afternoon)	1	1	N	6	Day 1	21	22	1		6	0		6	4	0		4	6	4		2	2		9	9	0		1	1	1	5,6	Y	Y	B	F	1.017	1.011	B2	B1	3	103	26	102	19
1172	13	2	2		There is water every day, but not always all day (don't refill in the afternoon)	0	0	N	6	Day 1	17	17	0		2	0		2	2	2		0	6	4		4	3		5	5	0		1	1	1	1,5	Y	Y	B	F	1.006	1.008	B2	B1	3	103	26	102	19
1173	14	3	3		There is water every day, but not always all day (don't refill in the afternoon)	1	1	Y	6	Day 1	10	10	0		2	0		2	4	1		3	6	4		6	5		13	14	1		1	1	1	1,5	Y	Y	B	M	1.011	1.015	A1	A2	2	103	26	102	19
1173	14	2	2		There is water every day, but not always all day (don't refill in the afternoon)	0	1	Y	6	Day 1	27	27	0		2	1		1	2	1		1	5	4		3	4		23	29	6		1	1	1	1,5	Y	Y	B	M	1.008	1.012	A1	A2	3	103	26	102	19
1174	14	1	1		There is water every day, but not always all day (don't refill in the afternoon)	0	0	Y	6	Day 1	18	18	0		2	0		2	3	0		3	6	4		4	3		8	11	3		1	1	1	5,6	Y	Y	B	F	1.001	1.001	A2	A1	4	103	26	102	19
1174	14	2	1		There is water every day, but not always all day (don't refill in the afternoon)	0	0	Y	6	Day 1	26	26	0		2	0		2	2	0		2	5	4		2	2		27	29	2		1	1	1	1,5,6	Y	Y	B	F	1.006	1.003	A2	A1	5	103	26	102	19
1175	14	1	3	IIC: CIRCLED ON P8	There is water every day, but not always all day (don't refill in the afternoon)	0	1	N	6	Day 1	18	18	0		3	1		2	0	0	X	0	5	4		4	3		21	25	4		1	1	1	5	Y	Y	B	M	1.001	1.019	B1	B2	4	103	26	102	19
1175	14	1	1	IIC: CIRCLED ON PAGE 8 AS WELL	There is water every day, but not always all day (don't refill in the afternoon)	0	0	N	6	Day 1	14	14	0		3	1		2	2	0	X	2	5	4		4	3		27	29	2		1	1	1	5	Y	Y	B	M	1.005	1.004	B1	B2	1	103	26	102	19
1176	13	1	4		There is water every day, but not always all day (don't refill in the afternoon)	0	1	Y	6	Day 1	27	27	0		2	1		1	3	0		3	7	5		3	3		22	24	2		1	1	1	2,5	Y	Y	B	M	1.001	1.019	B2	B1	5	103	26	102	19
1176	13	1	2		There is water every day, but not always all day (don't refill in the afternoon)	0	0	Y	6	Day 1	17	17	0		1	1		0	2	0		2	5	4		5	4		8	9	1		1	1	1	5	Y	Y	B	M	1.004	1.006	B2	B1	3	103	26	102	19
1177	11	1	6		There is water every day, but not always all day (don't refill in the afternoon)	0	1	Y	6	Day 1	37	37	0		3	0		3	5	0		5	6	4		4	3		25	26	1		2	1	1	5	Y	Y	B	M	1.001	1.022	A1	A2	2	103	26	102	19
1177	11	2	4		There is water every day, but not always all day (don't refill in the afternoon)	0	1	Y	6	Day 1	28	29	1		2	0		2	3	0		3	6	4		4	3		8	8	0		2	1	1	5	Y	Y	B	M	1.006	1.019	A1	A2	2	103	26	102	19
1178	16	6	6		There is water every day, but not always all day (don't refill in the afternoon)	1	1	N	6	Day 1	21	21	0		1	0		1	2	2		0	4	3		3	3		15	15	0		1	1	1	5	Y	Y	B	M	1.016	1.022	A2	A1	2	103	26	102	19
1178	16	1	7	IDC: CIRCLED ENTIRE ELEPHANT	There is water every day, but not always all day (don't refill in the afternoon)	0	1	N	6	Day 1	16	16	0		0	1	X	-1	0	0		0	5	4		3	4		13	13	0		1	1	1	5	Y	Y	B	M	1.001	1.032	A2	A1	3	103	26	102	19
1179	12	1	4		There is water every day, but not always all day (don't refill in the afternoon)	0	1	Y	6	Day 1	27	27	0		3	1		2	4	0		4	4	3		5	5		21	24	3		1	1	1	1,5	Y	Y	B	M	1.004	1.017	B1	B2	5	103	26	102	19
1179	12	2	2		There is water every day, but not always all day (don't refill in the afternoon)	1	0	Y	6	Day 1	20	20	0		1	2		-1	3	0		3	4	3		3	3		4	4	0		1	1	1	1,5	Y	Y	B	M	1.01	1.008	B1	B2	3	103	26	102	19
1180	15	3	4		There is water every day, but not always all day (don't refill in the afternoon)	0	1	N	6	Day 1	30	30	0		3	1		2	4	0		4	7	6		4	5		29	29	0		1	1	1	1,5	Y	Y	B	F	1.008	1.012	B2	B1	4	103	26	102	19
1180	15	2	6		There is water every day, but not always all day (don't refill in the afternoon)	0	1	N	6	Day 1	17	17	0		3	0		3	6	0		6	8	7		3	3		11	12	1		1	1	1	5	Y	Y	B	F	1.004	1.018	B2	B1	5	103	26	102	19
1181	11	2	6		There is water every day, but not always all day (don't refill in the afternoon)	0	1	Y	5	Day 1	16	16	0		1	0		1	3	0		3	5	4		4	3		3	3	0	R	1	1	1	2,5	Y	Y	B	M	1.003	1.017	A2	A1	5	103	26	102	19
1181	11	2	3		There is water every day, but not always all day (don't refill in the afternoon)	0	1	Y	5	Day 1	21	21	0		1	0		1	1	0		1	5	4		5	4		17	22	5		1	1	1	1,5	Y	Y	B	M	1.006	1.016	A2	A1	5	103	26	102	19
1182	11	1	6		There is water every day, but not always all day (don't refill in the afternoon)	0	1	Y	5	Day 1	8	8	0		0	0		0	0	0		0	2	2		1	2		9	9	0		1	1	1	5	Y	Y	B	F	1.001	1.019	B1	B2	1	103	26	102	19
1182	11	2	4		There is water every day, but not always all day (don't refill in the afternoon)	0	1	Y	5	Day 1	23	25	2		2	1		1	1	0		1	4	3		1	2		11	12	1		1	1	1	5	Y	Y	B	F	1.005	1.018	B1	B2	3	103	26	102	19
1183	12	2	2		There is water every day, but not always all day (don't refill in the afternoon)	0	0	Y	5	Day 1	13	13	0		1	0		1	1	0		1	2	3		2	3		22	23	1		1	1	1	1,5	Y	Y	B	M	1.005	1.004	B2	B1	1	103	26	102	19
1183	12	2	1		There is water every day, but not always all day (don't refill in the afternoon)	0	0	Y	5	Day 1	20	20	0		0	1		-1	1	0		1	2	3		2	4		21	22	1		1	1	1	1,2,5	Y	Y	B	M	1.005	1.003	B2	B1	1	103	26	102	19
1184	9	4	4		There is water every day, but not always all day (don't refill in the afternoon)	1	1	Y	5	Day 1	20	20	0		1	1		0	3	0		3	6	4		3	3		16	20	4		1	1	1	1,2,5	Y	Y	B	M	1.024	1.012	A1	A2	5	103	26	102	19
1184	9	1	1	LTM:DREW LINE OUTSIDE. THIRST: NO MARK	There is water every day, but not always all day (don't refill in the afternoon)	0	0	Y	5	Day 1	13	13	0		1	0		1	1	0		1	4	3		2	2					X	1	1	1	1,2,5	Y	Y	B	M	1.002	1.002	A1	A2		103	26	102	19
1185	12	4	3		There is water every day, but not always all day (don't refill in the afternoon)	1	1	Y	5	Day 1	15	15	0		2	0		2	3	0		3	7	7		5	4		28	29	1		1	1	1	1	Y	Y	B	M	1.014	1.017	A2	A1	4	103	26	102	19
1185	12	1	2		There is water every day, but not always all day (don't refill in the afternoon)	0	1	Y	5	Day 1	30	30	0		3	1		2	2	2		0	7	5		4	4		21	25	4		1	1	1	1,5	Y	Y	B	M	1.003	1.01	A2	A1	4	103	26	102	19
1186	9	2	1		There is water every day, but not always all day (don't refill in the afternoon)	0	0	Y	5	Day 1	20	20	0		3	0		3	1	0		1	6	5		2	2		17	18	1		1	1	1	5	Y	Y	B	F	1.004	1.001	B1	B2	4	103	26	102	19
1186	9	2	3		There is water every day, but not always all day (don't refill in the afternoon)	0	1	Y	5	Day 1	29	29	0		1	0		1	2	0		2	5	4		4	3		16	20	4		1	1	1	5	Y	Y	B	F	1.007	1.02	B1	B2	4	103	26	102	19
1187	12	4	4		There is water every day, but not always all day (don't refill in the afternoon)	1	1	Y	5	Day 1	15	15	0		2	0		2	2	0		2	7	5		7	5		21	22	1		1	1	1	1,5	Y	Y	B	M	1.01	1.024	B2	B1	5	103	26	102	19
1187	12	2	2		There is water every day, but not always all day (don't refill in the afternoon)	0	1	Y	5	Day 1	29	29	0		3	0		3	2	0		2	7	5		6	4		19	19	0		1	1	1	1,5	Y	Y	B	M	1.008	1.013	B2	B1	4	103	26	102	19
1188	12	4	3		There is water every day, but not always all day (don't refill in the afternoon)	1	1	N	5	Day 1	19	19	0		2	0		2	0	1		-1	5	4		4	3		18	23	5		1	1	1	1,5	Y	Y	B	M	1.019	1.01	A1	A2	1	103	26	102	19
1188	12	3	3		There is water every day, but not always all day (don't refill in the afternoon)	1	1	N	5	Day 1	34	34	0		2	1		1	2	0		2	5	5		2	3		21	29	8		1	1	1	1,5	Y	Y	B	M	1.014	1.018	A1	A2	5	103	26	102	19
1189	10	1	1	LTM:DREW LINE OUTSIDE	There is water every day, but not always all day (don't refill in the afternoon)	0	0	Y	5	Day 1	13	13	0		2	0		2	3	1		2	7	5		4	3					X	1	1	1	2,5	Y	Y	B	M	1.001	1.003	A2	A1	3	103	26	102	19
1189	10	1	2		There is water every day, but not always all day (don't refill in the afternoon)	0	0	Y	5	Day 1	21	21	0		4	0		4	2	2		0	7	5		4	3		24	29	5		1	1	1	5	Y	Y	B	M	1.001	1.009	A2	A1	4	103	26	102	19
1190	10	1	4		There is water every day, but not always all day (don't refill in the afternoon)	0	0	Y	5	Day 1	23	23	0		1	0		1	2	0		2	4	3		4	3		16	28	12		1	1	1	5	Y	Y	B	M	1.002	1.009	B1	B2	1	103	26	102	19
1190	10	1	3		There is water every day, but not always all day (don't refill in the afternoon)	0	0	Y	5	Day 1	24	24	0		3	0		3	1	0		1	4	3		4	4		9	13	4		1	1	1	1,2,5	Y	Y	B	M	1.001	1.009	B1	B2	5	103	26	102	19
1191	11	2	3		There is water every day, but not always all day (don't refill in the afternoon)	0	1	Y	5	Day 1	31	31	0		4	1		3	3	2		1	6	4		3	3		24	29	5		1	1	1	1,5	Y	Y	B	F	1.007	1.017	B2	B1	1	103	26	102	19
1191	11	1	1		There is water every day, but not always all day (don't refill in the afternoon)	0	0	Y	5	Day 1	28	28	0		3	3		0	1	1		0	6	4		5	4		11	14	3		1	1	1	1,5	Y	Y	B	F	1.003	1.003	B2	B1	5	103	26	102	19
1192	11	3	2		There is water every day, but not always all day (don't refill in the afternoon)	0	0	Y	5	Day 1	29	29	0		1	1		0	2	0		2	6	4		3	3		24	29	5		1	1	1	1,5	Y	Y	B	M	1.008	1.002	A1	A2	5	103	26	102	19
1192	11	2	6		There is water every day, but not always all day (don't refill in the afternoon)	0	1	Y	5	Day 1	22	22	0		1	1		0	1	1		0	4	3		2	2		25	29	4		1	1	1	2	Y	Y	B	M	1.003	1.022	A1	A2	5	103	26	102	19
1193	13	1	2		There is water every day, but not always all day (don't refill in the afternoon)	0	1	Y	5	Day 1	27	28	1		4	0		4	3	0		3	6	5		5	4		25	28	3		1	1	1	1,5	Y	Y	B	F	1.001	1.019	A2	A1	5	103	26	102	19
1193	13	4	4		There is water every day, but not always all day (don't refill in the afternoon)	1	1	Y	5	Day 1	34	34	0		0	0		0	3	0		3	5	5		2	2		7	7	0		1	1	1	5	Y	Y	B	F	1.011	1.017	A2	A1	5	103	26	102	19
1194	9	1	2		There is water every day, but not always all day (don't refill in the afternoon)	0	1	Y	5	Day 1	28	28	0		2	0		2	3	0		3	4	3		4	3		18	22	4		1	1	1	1,2,5	Y	Y	B	M	1.003	1.011	B1	B2	1	103	26	102	19
1194	9	4	3		There is water every day, but not always all day (don't refill in the afternoon)	1	0	Y	5	Day 1	19	19	0		2	0		2	1	0		1	6	4		5	4		14	16	2		1	1	1	1,2,5	Y	Y	B	M	1.02	1.008	B1	B2	1	103	26	102	19
1195	11	3	1		There is water every day, but not always all day (don't refill in the afternoon)	1	0	Y	5	Day 1	15	15	0		1	0		1	0	0		0	6	4		4	3		4	6	2		1	1	1	1,5	Y	Y	B	F	1.011	1.007	B2	B1	3	103	26	102	19
1195	11	2	2		There is water every day, but not always all day (don't refill in the afternoon)	0	0	Y	5	Day 1	17	17	0		0	0		0	0	0		0	5	4		4	3		7	10	3		1	1	0		Y	Y	B	F	1.007	1.009	B2	B1	2	103	26	102	19
1196	9	5	3		There is water every day, but not always all day (don't refill in the afternoon)	1	1	Y	5	Day 1	20	20	0		0	1		-1	2	0		2	4	3		3	4		11	15	4		1	1	1	5	Y	Y	B	F	1.015	1.014	A1	A2	5	103	26	102	19
1196	9	7	6		There is water every day, but not always all day (don't refill in the afternoon)	1	1	Y	5	Day 1	17	17	0		0	0		0	2	1		1	6	7		3	4		8	10	2		1	1	1	5	Y	Y	B	F	1.016	1.026	A1	A2	4	103	26	102	19
1197	11	1	2		There is water every day, but not always all day (don't refill in the afternoon)	0	1	Y	5	Day 1	15	15	0		0	0		0	1	0		1	4	3		2	2		18	28	10		1	1	1	5	Y	Y	B	F	1.003	1.015	A2	A1	1	103	26	102	19
1197	11	1	2	LTM: didn't draw anything	There is water every day, but not always all day (don't refill in the afternoon)	0	1	Y	5	Day 1	19	19	0		1	0		1	0	1		-1	7	5		2	2					X	1	1	1	5	Y	Y	B	F	1.001	1.011	A2	A1	1	103	26	102	19
1198	12	1	3		There is water every day, but not always all day (don't refill in the afternoon)	0	1	N	5	Day 1	14	14	0		0	0		0	3	0		3	6	5		2	2		17	18	1		1	1	1	1	Y	Y	B	M	1.001	1.017	B1	B2	5	103	26	102	19
1198	12	3	4		There is water every day, but not always all day (don't refill in the afternoon)	1	1	N	5	Day 1	16	16	0		2	0		2	4	0		4	6	4		1	2		15	16	1		1	1	1	1,5	Y	Y	B	M	1.011	1.022	B1	B2	4	103	26	102	19
1199	10	1	3		There is water every day, but not always all day (don't refill in the afternoon)	0	1	Y	5	Day 1	21	21	0		2	0		2	2	0		2	6	4		5	4		5	5	0		1	1	1	5	Y	Y	B	M	1.001	1.015	B2	B1	5	103	26	102	19
1199	10	2	3		There is water every day, but not always all day (don't refill in the afternoon)	0	1	Y	5	Day 1	33	33	0		3	0		3	3	0		3	5	5		4	4		8	9	1		1	1	1	1,5	Y	Y	B	M	1.006	1.014	B2	B1	5	103	26	102	19
1200	10	3	4	IDC/IIC: Pupil circled near differences, not around them	There is water every day, but not always all day (don't refill in the afternoon)	1	1	Y	5	Day 1	20	20	0		2	0	X	2	4	0	X	4	6	4		3	3		27	29	2		1	1	1	5	Y	Y	B	M	1.013	1.021	A1	A2	4	103	26	102	19
1200	10	2	1	IIC: CIRCLED ON PAGE 8	There is water every day, but not always all day (don't refill in the afternoon)	1	1	Y	5	Day 1	9	9	0		2	0		2	0	0	X	0	7	5		3	3		7	7	0		1	1	1	1	Y	Y	B	M	1.014	1.013	A1	A2	4	103	26	102	19
1201	12	2	3		There is water every day, but not always all day (don't refill in the afternoon)	0	1	N	5	Day 1	25	25	0		0	0		0	0	0		0	5	4		2	2		22	29	7		1	1	1	1,2,5	Y	Y	B	F	1.008	1.013	A2	A1	5	103	26	102	19
1201	12	1	1		There is water every day, but not always all day (don't refill in the afternoon)	0	0	N	5	Day 1	12	12	0		0	0		0	1	0		1	3	3		2	2		28	29	1		1	1	1	1,5	Y	Y	B	F	1.001	1.004	A2	A1	4	103	26	102	19
1202	11	6	4		There is water every day, but not always all day (don't refill in the afternoon)	1	1	N	5	Day 1	27	27	0		0	1		-1	0	0		0	6	4		4	3		12	12	0		1	1	1	1,5	Y	Y	B	F	1.019	1.015	B1	B2	1	103	26	102	19
1202	11	1	2		There is water every day, but not always all day (don't refill in the afternoon)	0	0	N	5	Day 1	32	32	0		1	0		1	0	0		0	7	5		3	3		12	13	1		1	1	1	1,5	Y	Y	B	F	1.002	1.005	B1	B2	5	103	26	102	19
1203	12	7	7	LTM: DREW VERY SHORT LINE	There is water every day, but not always all day (don't refill in the afternoon)	1	1	Y	5	Day 1	13	14	1		0	1		-1	1	0		1	4	3		2	2		0	0	0		1	1	1	2	Y	Y	B	M	1.022	1.025	B2	B1	1	103	26	102	19
1203	12	4	4		There is water every day, but not always all day (don't refill in the afternoon)	1	1	Y	5	Day 1	22	22	0		1	0		1	0	2		-2	5	4		2	2		17	26	9		1	1	1	1,5	Y	Y	B	M	1.019	1.021	B2	B1	1	103	26	102	19
1204	11	3	3		There is water every day, but not always all day (don't refill in the afternoon)	1	1	Y	5	Day 1	25	25	0		3	2		1	2	1		1	2	3		2	3		23	29	6		1	1	1	2,5	Y	Y	B	M	1.011	1.015	A1	A2	1	103	26	102	19
1204	11	1	3		There is water every day, but not always all day (don't refill in the afternoon)	0	1	Y	5	Day 1	25	25	0		1	3		-2	1	1		0	3	3		4	4		23	28	5		1	1	1	5	Y	Y	B	M	1.001	1.01	A1	A2	1	103	26	102	19
1205	11	4	3		There is water every day, but not always all day (don't refill in the afternoon)	1	1	Y	5	Day 1	35	35	0		1	2		-1	1	2		-1	5	4		3	3		19	28	9		1	1	1	5,6	Y	Y	B	M	1.016	1.022	A2	A1	3	103	26	102	19
1205	11	3	6		There is water every day, but not always all day (don't refill in the afternoon)	1	1	Y	5	Day 1	17	17	0		2	1		1	1	1		0	7	5		3	3		6	6	0		1	1	1	5	Y	Y	B	M	1.016	1.025	A2	A1	1	103	26	102	19
1206	12	2	4		There is water every day, but not always all day (don't refill in the afternoon)	0	1	Y	5	Day 1	23	23	0		2	0		2	2	0		2	6	5		2	2		14	16	2		1	1	1	1,2,5	Y	Y	B	M	1.005	1.019	B1	B2	1	103	26	102	19
1206	12	3	2		There is water every day, but not always all day (don't refill in the afternoon)	0	0	Y	5	Day 1	18	18	0		1	0		1	1	0		1	5	4		3	3		26	29	3		1	1	1	1,2,5	Y	Y	B	M	1.006	1.004	B1	B2	1	103	26	102	19
1207	12	3	3		There is water every day, but not always all day (don't refill in the afternoon)	1	1	Y	5	Day 1	25	25	0		1	0		1	3	0		3	5	4		5	5		12	15	3		1	1	1	1,5	Y	Y	B	M	1.016	1.017	B2	B1	4	103	26	102	19
1207	12	2	4		There is water every day, but not always all day (don't refill in the afternoon)	1	1	Y	5	Day 1	17	18	1		3	0		3	2	0		2	5	4		4	3		12	14	2		1	1	1	1,5	Y	Y	B	M	1.014	1.012	B2	B1	3	103	26	102	19
1208	10	3	5		There is water every day, but not always all day (don't refill in the afternoon)	0	1	Y	5	Day 1	22	22	0		0	0		0	0	1		-1	6	4		6	4		8	9	1		1	1	1	1,5	Y	Y	B	M	1.008	1.016	A1	A2	1	103	26	102	19
1208	10	1	4		There is water every day, but not always all day (don't refill in the afternoon)	0	1	Y	5	Day 1	25	25	0		0	1		-1	3	0		3	6	4		6	4		17	18	1		1	1	1	5	Y	Y	B	M	1.002	1.02	A1	A2	3	103	26	102	19
1209	11	1	4		There is water every day, but not always all day (don't refill in the afternoon)	0	1	Y	5	Day 1	33	33	0		1	1		0	2	0		2	6	4		2	4		19	21	2		1	1	1	2,5	Y	Y	B	M	1.001	1.018	A2	A1	5	103	26	102	19
1209	11	2	3		There is water every day, but not always all day (don't refill in the afternoon)	0	1	Y	5	Day 1	17	17	0		1	0		1	2	1		1	4	3		3	3		6	8	2		1	1	1	2,5	Y	Y	B	M	1.004	1.011	A2	A1	5	103	26	102	19
1210	12	3	2		There is water every day, but not always all day (don't refill in the afternoon)	1	1	Y	5	Day 1	25	25	0		2	0		2	2	1		1	4	3		2	3		22	28	6		1	1	1	5	Y	Y	B	M	1.011	1.01	B1	B2	5	103	26	102	19
1210	12	3	4		There is water every day, but not always all day (don't refill in the afternoon)	0	1	Y	5	Day 1	14	14	0		2	0		2	0	1		-1	2	2		3	4		6	8	2	R	1	1	1	1,5	Y	Y	B	M	1.009	1.016	B1	B2	4	103	26	102	19
[truncated: 2 more columns]

## Sheet: codebook
Variable			Label
Age	=	"	Age	"
coloram	=	"	Urine color, MORNING (Scale 1-8)	"
colorpm	=	"	Urine color, AFTERNOON (Scale 1-8)	"
Comments_COG	=	"	Comments_cognitive test	"
Comments_PS	=	"	Comments_pupil survey	"
date	=	"	date of visit	"
dehydAM	=	"	Dehydrated in morning (0=no 1=yes)	"
dehydPM	=	"	Dehydrated in afternoon (0=no 1=yes)	"
EAU_JOUR_2	=	"	Pupil was noted to bring water bottle on second visit (School B only)	"
Grade	=	"	Grade	"
Humid	=	"	Humidity	"
ID	=	"	pupil ID	"
IDC	=	"	Image direct correct (raw score)	"
IDI	=	"	Image direct incorrect (raw score)	"
IDS	=	"	Image direct score (IDC-IDI)	"
IDX	=	"	Error indicator for Image direct X=did not understand	"
IIC	=	"	Image Indirect correct (raw score)	"
III	=	"	Image Indirect incorrect (raw score)	"
IIS	=	"	Image Indirect score (IIC-III)	"
IIX	=	"	Error indicator for Image Indirect X=did not understand	"
LCC	=	"	Letter Cancel correct (raw score)	"
LCI	=	"	Letter Cancel incorrect (raw score)	"
LCS	=	"	Letter Cancel score (LCC-LCI)	"
LCX	=	"	Error indicator for Letter Cancel X=did not understand	"
LT	=	"	Line Trace score (LTM-LTE)	"
LTE	=	"	Line Trace errors (raw score)	"
LTM	=	"	Line trace maximum length (raw score)	"
LTX	=	"	Error indicator for Line Trace X=did not understand	"
NFC	=	"	Number recall Forward correct (raw score)	"
NFM	=	"	Number recall Forward maximum (raw score)	"
NFX	=	"	Error indicator for Number recall forward X=did not understand	"
NRC	=	"	Number recall Reverse correct (raw score)	"
NRM	=	"	Number recall Reverse maximum (raw score)	"
NRX	=	"	Error indicator for Number recall Reverse X=did not understand	"
P000	=	"	Pupil consent 0=No 1=Yes	"
P105	=	"	Frequency of drinking water at school 0=Most/Every day 1=Sometimes 2=Almost never/Never	"
P106	=	"	Ate food this morning (raw) 0=No 1=Yes	"
P107	=	"	Drank anything this morning (raw) 0=No 1=Yes	"
P108	=	"	What pupil reported drinking 1=Water 2=Tea/Coff 3=Juice 4=Soda 5=Thin porridge 6=Milk 88=Other	"
PRES	=	"	Pupil is present	"
School	=	"	school indicator A or B	"
sgam	=	"	specific gravity in MORNING	"
sgpm	=	"	specific gravity in AFTERNOON	"
Temp	=	"	Tempterature	"
TEST	=	"	Test version (4 versions total)	"
Thirsty	=	"	Self-reported thirst (5-point Likert Scale)	"
visit	=	"	1= 1st visit 2=2nd visit	"
WATER	=	"	Condition indicator 0=Control 1=Water	"
